# Supplementary material
Source: publisher site journal article supplement (https://www.e-cmh.org/upload/media/cmh-2022-0316-Supplementary-Table-5.pdf)
Supplement: Supplementary file 1 [file cmh-2022-0316-Supplementary-Table-5.pdf]

**Supplementary Table 5.** Incidence of liver cancer in 1990 and 2019 for both sexes and percentage change in age-standardized rates based on location

| Incidence of liver cancer             | 1990                          |                      | 2019                          |                     | Percentage change in Age-standardized rates between 1990 and 2019 |
|---------------------------------------|-------------------------------|----------------------|-------------------------------|---------------------|-------------------------------------------------------------------|
|                                       | Counts (95% UI)               | Rate (95% UI)        | Counts (95% UI)               | Rate (95% UI)       |                                                                   |
| Global                                | 373,390<br>(335,890, 415,748) | 9<br>(8.1, 10)       | 534,364<br>(486,550, 588,639) | 6.5<br>(5.9, 7.2)   | -0.3<br>(-0.4, -0.2)                                              |
| High SDI                              | 53,494<br>(51,832, 54,709)    | 5.3<br>(5.1, 5.4)    | 140,145<br>(125,500, 154,013) | 7.6<br>(6.9, 8.4)   | 0.4<br>(0.3, 0.6)                                                 |
| High-middle SDI                       | 108,733<br>(95,240, 123,109)  | 9.9<br>(8.7, 11.2)   | 106,792<br>(94,151, 120,908)  | 5.3<br>(4.7, 6)     | -0.5<br>(-0.6, -0.3)                                              |
| Middle SDI                            | 166,088<br>(144,078, 193,619) | 14.7<br>(12.8, 17)   | 185,567<br>(162,261, 210,710) | 7.3<br>(6.4, 8.3)   | -0.5<br>(-0.6, -0.4)                                              |
| Low-middle SDI                        | 34,720<br>(31,279, 38,612)    | 5.4<br>(4.9, 5.9)    | 55,345<br>(50,136, 61,558)    | 4<br>(3.6, 4.4)     | -0.3<br>(-0.4, -0.1)                                              |
| Low SDI                               | 10,249<br>(8,996, 11,593)     | 4.1<br>(3.6, 4.6)    | 19,279<br>(16,951, 21,648)    | 3.5<br>(3.1, 3.9)   | -0.1<br>(-0.3, 0)                                                 |
| East Asia                             | 241,531<br>(204,188, 284,759) | 25.3<br>(21.5, 29.7) | 217,171<br>(181,403, 257,464) | 10.4<br>(8.8, 12.3) | -0.6<br>(-0.7, -0.5)                                              |
| China                                 | 236,825<br>(199,322, 280,116) | 25.7<br>(21.7, 30.3) | 210,462<br>(174,832, 251,195) | 10.5<br>(8.7, 12.4) | -0.6<br>(-0.7, -0.5)                                              |
| Democratic People's Republic of Korea | 2,589<br>(1,965, 3,410)       | 14.6<br>(11.3, 19)   | 3,353<br>(2,492, 4,402)       | 10.2<br>(7.7, 13.4) | -0.3<br>(-0.5, 0)                                                 |
| Taiwan (Province of China)            | 2,118<br>(2,030, 2,208)       | 12.3<br>(11.7, 12.8) | 3,356<br>(2,609, 4,335)       | 8.6<br>(6.7, 11.1)  | -0.3<br>(-0.5, -0.1)                                              |
| Southeast Asia                        | 17,307<br>(15,374, 18,982)    | 6.4<br>(5.7, 7.1)    | 42,800<br>(35,218, 52,129)    | 7.1<br>(5.9, 8.6)   | 0.1<br>(-0.1, 0.4)                                                |
| Cambodia                              | 622<br>(486, 805)             | 10.9<br>(8.8, 13.1)  | 1,144<br>(887, 1,413)         | 9.2<br>(7.3, 11.3)  | -0.2<br>(-0.4, 0.2)                                               |
| Mauritius                             | 14<br>(13, 15)                | 1.8<br>(1.7, 1.9)    | 33<br>(25, 43)                | 1.9<br>(1.5, 2.5)   | 0.1<br>(-0.2, 0.4)                                                |
| Seychelles                            | 4<br>(4, 5)                   | 7.7<br>(6.7, 8.9)    | 6<br>(5, 7)                   | 5.6<br>(4.7, 6.6)   | -0.3<br>(-0.4, -0.1)                                              |
| Indonesia                             | 2,472<br>(2,137, 2,837)       | 2.4<br>(2.1, 2.8)    | 4,504<br>(3,796, 5,158)       | 2.2<br>(1.9, 2.5)   | -0.1<br>(-0.3, 0.1)                                               |
| Lao People's Democratic Republic      | 220<br>(150, 300)             | 10<br>(7, 13.5)      | 305<br>(223, 395)             | 6.7<br>(5.1, 8.5)   | -0.3<br>(-0.5, 0)                                                 |
| Malaysia                              | 523<br>(448, 612)             | 5.5<br>(4.7, 6.4)    | 1,641<br>(1,243, 2,134)       | 6.1<br>(4.6, 7.8)   | 0.1<br>(-0.2, 0.5)                                                |
| Maldives                              | 6<br>(4, 9)                   | 6.8<br>(4.7, 10.1)   | 17<br>(13, 21)                | 5.5<br>(4.3, 6.7)   | -0.2<br>(-0.5, 0.2)                                               |
| Myanmar                               | 643<br>(458, 925)             | 2.8<br>(2, 3.9)      | 1,868<br>(1,543, 2,237)       | 4.1<br>(3.5, 4.9)   | 0.5<br>(0, 1.1)                                                   |
| Philippines                           | 3,167<br>(2,422, 3,895)       | 9.6<br>(7.3, 11.9)   | 5,301<br>(4,244, 6,574)       | 6.4<br>(5.2, 7.8)   | -0.3<br>(-0.5, 0)                                                 |
| Sri Lanka                             | 222<br>(194, 254)             | 2.1<br>(1.8, 2.3)    | 711<br>(512, 953)             | 2.8<br>(2.1, 3.7)   | 0.4<br>(-0.1, 0.9)                                                |

**Supplementary Table 5.** Continued

| Incidence of liver cancer        | 1990                    |                      | 2019                       |                      | Percentage change in Age-standardized rates between 1990 and 2019 |
|----------------------------------|-------------------------|----------------------|----------------------------|----------------------|-------------------------------------------------------------------|
|                                  | Counts (95% UI)         | Rate (95% UI)        | Counts (95% UI)            | Rate (95% UI)        |                                                                   |
| Thailand                         | 7,869<br>(6,830, 9,009) | 20.8<br>(18.1, 23.7) | 24,828<br>(18,287, 33,055) | 24.2<br>(17.9, 32)   | 0.2<br>(-0.2, 0.6)                                                |
| Timor-Leste                      | 23<br>(15, 33)          | 7.5<br>(5, 10.4)     | 51<br>(33, 72)             | 6.2<br>(4.2, 8.6)    | -0.2<br>(-0.4, 0.2)                                               |
| Viet Nam                         | 1,500<br>(1,119, 1,893) | 3.7<br>(2.8, 4.6)    | 2,335<br>(1,787, 2,945)    | 2.6<br>(2, 3.3)      | -0.3<br>(-0.5, 0.1)                                               |
| Oceania                          | 113<br>(95, 132)        | 3.7<br>(3.1, 4.2)    | 234<br>(195, 278)          | 3.3<br>(2.8, 3.9)    | -0.1<br>(-0.3, 0.1)                                               |
| Fiji                             | 22<br>(18, 28)          | 5.7<br>(4.6, 7.1)    | 47<br>(36, 61)             | 6<br>(4.7, 7.6)      | 0.1<br>(-0.2, 0.5)                                                |
| American Samoa                   | 1<br>(1, 2)             | 5.5<br>(4.2, 6.7)    | 3<br>(3, 4)                | 6.9<br>(5.7, 8.4)    | 0.3<br>(0, 0.7)                                                   |
| Cook Islands                     | 2<br>(1, 2)             | 13.3<br>(11, 15.6)   | 3<br>(2, 3)                | 11.4<br>(9.1, 13.9)  | -0.1<br>(-0.3, 0.1)                                               |
| Guam                             | 3<br>(3, 4)             | 3.8<br>(3.2, 4.4)    | 11<br>(9, 14)              | 5.9<br>(4.8, 7.2)    | 0.6<br>(0.2, 1)                                                   |
| Nauru                            | 0<br>(0, 1)             | 10.5<br>(7.6, 13.4)  | 0<br>(0, 1)                | 9.2<br>(6.5, 12.6)   | -0.1<br>(-0.4, 0.2)                                               |
| Niue                             | 0<br>(0, 0)             | 8.1<br>(6.4, 10.1)   | 0<br>(0, 0)                | 7.4<br>(5.7, 9.5)    | -0.1<br>(-0.3, 0.3)                                               |
| Northern Mariana Islands         | 1<br>(1, 2)             | 6.8<br>(5.4, 8.4)    | 5<br>(4, 6)                | 8<br>(6.6, 9.7)      | 0.2<br>(-0.1, 0.5)                                                |
| Palau                            | 1<br>(1, 1)             | 9.6<br>(6.7, 13.3)   | 2<br>(2, 3)                | 10<br>(7.7, 12.9)    | 0<br>(-0.3, 0.6)                                                  |
| Tokelau                          | 0<br>(0, 0)             | 8.4<br>(6.2, 11)     | 0<br>(0, 0)                | 7.3<br>(5.3, 9.9)    | -0.1<br>(-0.4, 0.2)                                               |
| Tuvalu                           | 1<br>(1, 1)             | 10.4<br>(7.9, 13.5)  | 1<br>(1, 1)                | 8.5<br>(6.2, 11.3)   | -0.2<br>(-0.4, 0.1)                                               |
| Kiribati                         | 6<br>(5, 7)             | 13.9<br>(10.8, 17.3) | 9<br>(7, 12)               | 11.7<br>(9.1, 14.7)  | -0.2<br>(-0.4, 0.2)                                               |
| Marshall Islands                 | 2<br>(2, 3)             | 11.7<br>(8.9, 15.3)  | 4<br>(3, 5)                | 10.2<br>(7.4, 13.8)  | -0.1<br>(-0.4, 0.2)                                               |
| Micronesia (Federated States of) | 5<br>(4, 7)             | 11.2<br>(8.3, 14.5)  | 8<br>(5, 12)               | 10.4<br>(6.9, 14.5)  | -0.1<br>(-0.4, 0.4)                                               |
| Papua New Guinea                 | 25<br>(19, 32)          | 1.4<br>(1.1, 1.8)    | 65<br>(50, 85)             | 1.5<br>(1.2, 2)      | 0.1<br>(-0.2, 0.5)                                                |
| Samoa                            | 6<br>(4, 7)             | 6<br>(4.8, 7.6)      | 8<br>(6, 10)               | 5<br>(3.8, 6.3)      | -0.2<br>(-0.4, 0.1)                                               |
| Solomon Islands                  | 11<br>(8, 14)           | 6.7<br>(5, 8.6)      | 19<br>(15, 24)             | 5.4<br>(4.3, 6.6)    | -0.2<br>(-0.4, 0.1)                                               |
| Tonga                            | 14<br>(9, 18)           | 23.3<br>(16.2, 30.1) | 20<br>(14, 26)             | 24.3<br>(17.7, 31.9) | 0<br>(-0.3, 0.4)                                                  |

**Supplementary Table 5.** Continued

| Incidence of liver cancer | 1990                    |                      | 2019                    |                        | Percentage change in Age-standardized rates between 1990 and 2019 |
|---------------------------|-------------------------|----------------------|-------------------------|------------------------|-------------------------------------------------------------------|
|                           | Counts (95% UI)         | Rate (95% UI)        | Counts (95% UI)         | Rate (95% UI)          |                                                                   |
| Vanuatu                   | 6<br>(4, 10)            | 9.2<br>(5.9, 13.8)   | 16<br>(11, 23)          | 9.1<br>(6.2, 12.9)     | 0<br>(-0.3, 0.5)                                                  |
| Central Asia              | 1,493<br>(1,329, 1,658) | 3.1<br>(2.8, 3.5)    | 6,109<br>(5,296, 7,001) | 8.3<br>(7.2, 9.4)      | 1.6<br>(1.2, 2.1)                                                 |
| Armenia                   | 30<br>(27, 32)          | 1.1<br>(1, 1.2)      | 271<br>(225, 323)       | 6.6<br>(5.5, 7.8)      | 5<br>(3.9, 6.3)                                                   |
| Azerbaijan                | 51<br>(46, 58)          | 1<br>(0.9, 1.1)      | 358<br>(274, 472)       | 4.1<br>(3.1, 5.5)      | 3.1<br>(2.1, 4.8)                                                 |
| Georgia                   | 68<br>(62, 75)          | 1.1<br>(1, 1.3)      | 200<br>(164, 244)       | 3.5<br>(2.9, 4.3)      | 2.1<br>(1.5, 2.8)                                                 |
| Kazakhstan                | 450<br>(419, 482)       | 3.5<br>(3.2, 3.7)    | 1,101<br>(946, 1,272)   | 6.3<br>(5.4, 7.2)      | 0.8<br>(0.6, 1.1)                                                 |
| Kyrgyzstan                | 40<br>(36, 45)          | 1.3<br>(1.2, 1.4)    | 114<br>(97, 132)        | 2.5<br>(2.2, 2.9)      | 1<br>(0.7, 1.4)                                                   |
| Mongolia                  | 680<br>(544, 827)       | 64.2<br>(51.7, 77.5) | 2,311<br>(1,767, 2,994) | 105.2<br>(82.6, 131.5) | 0.6<br>(0.2, 1.2)                                                 |
| Tajikistan                | 34<br>(30, 38)          | 1<br>(0.9, 1.2)      | 174<br>(139, 219)       | 3.7<br>(3, 4.7)        | 2.6<br>(1.8, 3.5)                                                 |
| Turkmenistan              | 25<br>(23, 29)          | 1.2<br>(1.1, 1.3)    | 234<br>(184, 298)       | 5.6<br>(4.4, 7)        | 3.8<br>(2.7, 5.1)                                                 |
| Uzbekistan                | 115<br>(99, 134)        | 0.9<br>(0.8, 1)      | 1,346<br>(1,098, 1,615) | 6.3<br>(5.3, 7.5)      | 6<br>(4.6, 7.5)                                                   |
| Central Europe            | 7,699<br>(7,443, 7,902) | 5.3<br>(5.1, 5.4)    | 6,906<br>(5,994, 7,986) | 3.3<br>(2.9, 3.8)      | -0.4<br>(-0.5, -0.3)                                              |
| Albania                   | 224<br>(209, 240)       | 10.9<br>(10.1, 11.6) | 281<br>(205, 376)       | 6.6<br>(4.8, 8.8)      | -0.4<br>(-0.6, -0.2)                                              |
| Bosnia and Herzegovina    | 229<br>(212, 246)       | 5.5<br>(5.1, 5.9)    | 452<br>(359, 570)       | 7.5<br>(6, 9.5)        | 0.4<br>(0.1, 0.7)                                                 |
| Bulgaria                  | 782<br>(732, 836)       | 6.2<br>(5.8, 6.6)    | 614<br>(489, 758)       | 4.5<br>(3.6, 5.6)      | -0.3<br>(-0.4, -0.1)                                              |
| Croatia                   | 200<br>(185, 216)       | 3.1<br>(2.9, 3.4)    | 321<br>(252, 404)       | 3.7<br>(2.9, 4.7)      | 0.2<br>(-0.1, 0.5)                                                |
| Czechia                   | 596<br>(566, 624)       | 4.3<br>(4.1, 4.5)    | 615<br>(504, 755)       | 3<br>(2.4, 3.6)        | -0.3<br>(-0.4, -0.1)                                              |
| Hungary                   | 952<br>(909, 993)       | 6.5<br>(6.2, 6.7)    | 486<br>(400, 592)       | 2.6<br>(2.1, 3.2)      | -0.6<br>(-0.7, -0.5)                                              |
| North Macedonia           | 163<br>(146, 179)       | 8.6<br>(7.7, 9.5)    | 270<br>(213, 344)       | 8.4<br>(6.6, 10.6)     | 0<br>(-0.3, 0.2)                                                  |
| Montenegro                | 38<br>(31, 44)          | 6.1<br>(5, 7)        | 58<br>(47, 72)          | 6<br>(4.8, 7.3)        | 0<br>(-0.2, 0.4)                                                  |
| Poland                    | 3,007<br>(2,892, 3,101) | 7<br>(6.7, 7.2)      | 1,349<br>(1,131, 1,599) | 1.9<br>(1.6, 2.3)      | -0.7<br>(-0.8, -0.7)                                              |

**Supplementary Table 5.** Continued

| Incidence of liver cancer | 1990                       |                      | 2019                       |                      | Percentage change in Age-standardized rates between 1990 and 2019 |
|---------------------------|----------------------------|----------------------|----------------------------|----------------------|-------------------------------------------------------------------|
|                           | Counts (95% UI)            | Rate (95% UI)        | Counts (95% UI)            | Rate (95% UI)        |                                                                   |
| Romania                   | 483<br>(433, 543)          | 1.7<br>(1.6, 1.9)    | 1,064<br>(865, 1,294)      | 3<br>(2.5, 3.7)      | 0.7<br>(0.4, 1.1)                                                 |
| Serbia                    | 682<br>(568, 789)          | 6<br>(5, 6.9)        | 862<br>(678, 1,087)        | 5.4<br>(4.3, 6.8)    | -0.1<br>(-0.3, 0.2)                                               |
| Slovakia                  | 272<br>(255, 293)          | 4.5<br>(4.3, 4.9)    | 311<br>(242, 395)          | 3.4<br>(2.7, 4.3)    | -0.2<br>(-0.4, 0)                                                 |
| Slovenia                  | 71<br>(55, 91)             | 2.9<br>(2.2, 3.7)    | 223<br>(171, 286)          | 5.3<br>(4, 6.8)      | 0.8<br>(0.2, 1.6)                                                 |
| Eastern Europe            | 4,139<br>(3,971, 4,327)    | 1.5<br>(1.5, 1.6)    | 9,407<br>(8,199, 10,735)   | 2.8<br>(2.5, 3.2)    | 0.9<br>(0.7, 1.1)                                                 |
| Belarus                   | 163<br>(154, 173)          | 1.3<br>(1.2, 1.4)    | 381<br>(275, 512)          | 2.5<br>(1.8, 3.3)    | 0.9<br>(0.4, 1.6)                                                 |
| Estonia                   | 42<br>(39, 45)             | 2.1<br>(1.9, 2.2)    | 94<br>(72, 118)            | 3.7<br>(2.8, 4.7)    | 0.8<br>(0.4, 1.3)                                                 |
| Latvia                    | 58<br>(54, 62)             | 1.7<br>(1.5, 1.8)    | 101<br>(84, 122)           | 2.7<br>(2.2, 3.3)    | 0.6<br>(0.3, 0.9)                                                 |
| Lithuania                 | 74<br>(69, 79)             | 1.7<br>(1.6, 1.8)    | 172<br>(136, 211)          | 3.2<br>(2.5, 4)      | 0.9<br>(0.5, 1.4)                                                 |
| Republic of Moldova       | 73<br>(68, 78)             | 1.6<br>(1.5, 1.8)    | 132<br>(111, 155)          | 2.3<br>(2, 2.7)      | 0.4<br>(0.2, 0.6)                                                 |
| Russian Federation        | 3,044<br>(2,910, 3,207)    | 1.7<br>(1.6, 1.8)    | 6,598<br>(5,591, 7,845)    | 2.9<br>(2.5, 3.4)    | 0.7<br>(0.5, 1)                                                   |
| Ukraine                   | 685<br>(651, 720)          | 1<br>(0.9, 1.1)      | 1,930<br>(1,641, 2,285)    | 2.7<br>(2.3, 3.2)    | 1.7<br>(1.2, 2.2)                                                 |
| High-income Asia Pacific  | 28,212<br>(27,268, 29,085) | 13.8<br>(13.3, 14.2) | 67,946<br>(58,134, 77,642) | 15.6<br>(13.5, 17.7) | 0.1<br>(0, 0.3)                                                   |
| Brunei Darussalam         | 10<br>(8, 12)              | 9.7<br>(7.9, 11.5)   | 38<br>(32, 46)             | 11.8<br>(10, 13.8)   | 0.2<br>(0, 0.5)                                                   |
| Japan                     | 24,465<br>(23,601, 25,148) | 14.2<br>(13.7, 14.6) | 46,660<br>(37,995, 55,120) | 12.7<br>(10.5, 15)   | -0.1<br>(-0.2, 0)                                                 |
| Republic of Korea         | 3,548<br>(2,935, 4,339)    | 11<br>(9.2, 13.4)    | 20,367<br>(16,678, 24,504) | 22.8<br>(18.7, 27.3) | 1.1<br>(0.6, 1.7)                                                 |
| Singapore                 | 189<br>(178, 201)          | 8.4<br>(7.9, 9)      | 881<br>(707, 1,110)        | 11.5<br>(9.2, 14.4)  | 0.4<br>(0.1, 0.7)                                                 |
| Australasia               | 476<br>(457, 494)          | 2<br>(2, 2.1)        | 2,160<br>(1,752, 2,667)    | 4.6<br>(3.7, 5.7)    | 1.2<br>(0.8, 1.8)                                                 |
| Australia                 | 384<br>(368, 400)          | 2<br>(1.9, 2.1)      | 1,799<br>(1,388, 2,309)    | 4.5<br>(3.5, 5.8)    | 1.3<br>(0.8, 1.9)                                                 |
| New Zealand               | 92<br>(85, 99)             | 2.4<br>(2.2, 2.6)    | 361<br>(297, 437)          | 5<br>(4.1, 6)        | 1.1<br>(0.7, 1.5)                                                 |
| Western Europe            | 20,184<br>(19,491, 20,702) | 3.6<br>(3.4, 3.6)    | 45,859<br>(39,837, 52,739) | 5.3<br>(4.6, 6.1)    | 0.5<br>(0.3, 0.7)                                                 |

**Supplementary Table 5.** Continued

| Incidence of liver cancer | 1990                    |                   | 2019                     |                   | Percentage change in Age-standardized rates between 1990 and 2019 |
|---------------------------|-------------------------|-------------------|--------------------------|-------------------|-------------------------------------------------------------------|
|                           | Counts (95% UI)         | Rate (95% UI)     | Counts (95% UI)          | Rate (95% UI)     |                                                                   |
| Andorra                   | 5<br>(4, 7)             | 9.6<br>(7.2, 13)  | 15<br>(11, 20)           | 11<br>(8.2, 14.4) | 0.1<br>(-0.2, 0.7)                                                |
| Monaco                    | 2<br>(2, 3)             | 3.5<br>(2.7, 4.3) | 8<br>(6, 10)             | 9<br>(7.1, 11.3)  | 1.6<br>(0.9, 2.6)                                                 |
| San Marino                | 1<br>(1, 1)             | 2.2<br>(1.8, 2.6) | 2<br>(1, 3)              | 3.2<br>(2.4, 4.3) | 0.5<br>(0, 1)                                                     |
| Austria                   | 398<br>(379, 418)       | 3.5<br>(3.3, 3.7) | 939<br>(753, 1,173)      | 5.5<br>(4.4, 6.9) | 0.6<br>(0.3, 1)                                                   |
| Belgium                   | 443<br>(418, 467)       | 2.9<br>(2.7, 3)   | 928<br>(734, 1,171)      | 4.3<br>(3.4, 5.4) | 0.5<br>(0.2, 0.9)                                                 |
| Cyprus                    | 25<br>(21, 29)          | 3.2<br>(2.7, 3.6) | 70<br>(60, 82)           | 3.7<br>(3.2, 4.3) | 0.2<br>(0, 0.5)                                                   |
| Denmark                   | 191<br>(180, 201)       | 2.4<br>(2.3, 2.5) | 434<br>(341, 553)        | 4<br>(3.1, 5.1)   | 0.7<br>(0.3, 1.1)                                                 |
| Finland                   | 236<br>(221, 251)       | 3.3<br>(3.1, 3.5) | 670<br>(530, 857)        | 5.5<br>(4.3, 7.1) | 0.7<br>(0.3, 1.2)                                                 |
| France                    | 3,976<br>(3,786, 4,159) | 5<br>(4.7, 5.2)   | 8,449<br>(6,482, 10,932) | 6.7<br>(5, 8.7)   | 0.3<br>(0, 0.7)                                                   |
| Germany                   | 3,171<br>(2,931, 3,425) | 2.5<br>(2.4, 2.7) | 9,300<br>(7,292, 11,872) | 5.1<br>(4, 6.4)   | 1<br>(0.5, 1.6)                                                   |
| Greece                    | 346<br>(324, 368)       | 2.3<br>(2.1, 2.4) | 802<br>(643, 1,002)      | 3.5<br>(2.8, 4.4) | 0.5<br>(0.2, 1)                                                   |
| Iceland                   | 6<br>(5, 6)             | 2<br>(1.9, 2.2)   | 19<br>(16, 22)           | 3.5<br>(3.1, 4)   | 0.7<br>(0.5, 1.1)                                                 |
| Ireland                   | 60<br>(56, 64)          | 1.5<br>(1.4, 1.6) | 295<br>(227, 374)        | 4<br>(3.1, 5.1)   | 1.7<br>(1.1, 2.5)                                                 |
| Israel                    | 122<br>(109, 135)       | 2.5<br>(2.2, 2.7) | 337<br>(263, 429)        | 3<br>(2.3, 3.8)   | 0.2<br>(-0.1, 0.6)                                                |
| Italy                     | 5,982<br>(5,811, 6,130) | 6.8<br>(6.6, 6.9) | 7,928<br>(6,450, 9,653)  | 6<br>(4.8, 7.4)   | -0.1<br>(-0.3, 0.1)                                               |
| Luxembourg                | 16<br>(15, 17)          | 3<br>(2.7, 3.2)   | 39<br>(30, 51)           | 4<br>(3.1, 5.3)   | 0.4<br>(0.1, 0.8)                                                 |
| Malta                     | 7<br>(6, 8)             | 1.6<br>(1.5, 1.8) | 22<br>(19, 26)           | 2.5<br>(2.1, 3)   | 0.6<br>(0.3, 0.9)                                                 |
| Netherlands               | 284<br>(269, 298)       | 1.5<br>(1.4, 1.5) | 1074<br>(836, 1,350)     | 3.3<br>(2.6, 4.2) | 1.3<br>(0.8, 1.9)                                                 |
| Norway                    | 105<br>(100, 110)       | 1.6<br>(1.6, 1.7) | 262<br>(218, 316)        | 2.9<br>(2.4, 3.5) | 0.8<br>(0.5, 1.1)                                                 |
| Portugal                  | 255<br>(241, 269)       | 1.9<br>(1.8, 2)   | 1,058<br>(825, 1,339)    | 4.9<br>(3.8, 6.3) | 1.6<br>(1, 2.3)                                                   |
| Spain                     | 2,132<br>(2,023, 2,225) | 3.9<br>(3.7, 4.1) | 5,411<br>(4,207, 6,881)  | 6<br>(4.6, 7.7)   | 0.5<br>(0.2, 1)                                                   |

**Supplementary Table 5.** Continued

| Incidence of liver cancer    | 1990                    |                    | 2019                       |                   | Percentage change in Age-standardized rates between 1990 and 2019 |
|------------------------------|-------------------------|--------------------|----------------------------|-------------------|-------------------------------------------------------------------|
|                              | Counts (95% UI)         | Rate (95% UI)      | Counts (95% UI)            | Rate (95% UI)     |                                                                   |
| Sweden                       | 351<br>(332, 369)       | 2.4<br>(2.3, 2.5)  | 595<br>(501, 697)          | 3<br>(2.6, 3.6)   | 0.3<br>(0.1, 0.5)                                                 |
| Switzerland                  | 266<br>(251, 281)       | 2.6<br>(2.5, 2.8)  | 959<br>(738, 1,244)        | 5.8<br>(4.4, 7.6) | 1.2<br>(0.7, 1.9)                                                 |
| United Kingdom               | 1,787<br>(1,722, 1,836) | 2<br>(2, 2.1)      | 6,201<br>(5,143, 7,417)    | 5.1<br>(4.2, 6.1) | 1.5<br>(1.1, 2)                                                   |
| Southern Latin America       | 721<br>(652, 791)       | 1.6<br>(1.4, 1.7)  | 1,939<br>(1,524, 2,424)    | 2.3<br>(1.8, 2.9) | 0.5<br>(0.2, 0.9)                                                 |
| Argentina                    | 453<br>(395, 514)       | 1.4<br>(1.2, 1.6)  | 1,105<br>(867, 1,381)      | 2<br>(1.6, 2.6)   | 0.5<br>(0.1, 0.9)                                                 |
| Chile                        | 215<br>(201, 231)       | 2.1<br>(2, 2.3)    | 714<br>(554, 899)          | 3<br>(2.3, 3.8)   | 0.4<br>(0.1, 0.8)                                                 |
| Uruguay                      | 53<br>(47, 60)          | 1.4<br>(1.2, 1.5)  | 120<br>(94, 153)           | 2.3<br>(1.8, 2.9) | 0.7<br>(0.3, 1.2)                                                 |
| High-income North America    | 7,533<br>(7,276, 7,697) | 2.2<br>(2.1, 2.3)  | 31,008<br>(25,713, 36,961) | 5.2<br>(4.3, 6.2) | 1.3<br>(0.9, 1.8)                                                 |
| Canada                       | 657<br>(628, 682)       | 2.1<br>(2, 2.1)    | 3,108<br>(2,397, 3,997)    | 4.7<br>(3.6, 6.1) | 1.3<br>(0.8, 2)                                                   |
| Greenland                    | 2<br>(1, 2)             | 4.5<br>(3.9, 5.2)  | 4<br>(3, 6)                | 6.2<br>(4.9, 7.7) | 0.4<br>(0, 0.8)                                                   |
| United States of America     | 6,874<br>(6,639, 7,029) | 2.2<br>(2.2, 2.3)  | 27,895<br>(22,785, 33,513) | 5.2<br>(4.3, 6.3) | 1.4<br>(0.9, 1.8)                                                 |
| Caribbean                    | 1,563<br>(1,452, 1,657) | 5.9<br>(5.5, 6.3)  | 1,628<br>(1,353, 1,938)    | 3.2<br>(2.6, 3.8) | -0.5<br>(-0.6, -0.4)                                              |
| Antigua and Barbuda          | 4<br>(4, 5)             | 7.7<br>(7, 8.5)    | 3<br>(2, 3)                | 2.7<br>(2.3, 3.1) | -0.7<br>(-0.7, -0.6)                                              |
| Bermuda                      | 4<br>(4, 5)             | 7.1<br>(6.4, 7.8)  | 3<br>(2, 3)                | 2.1<br>(1.7, 2.6) | -0.7<br>(-0.8, -0.6)                                              |
| Puerto Rico                  | 241<br>(225, 254)       | 6.6<br>(6.2, 6.9)  | 188<br>(141, 244)          | 2.8<br>(2.1, 3.6) | -0.6<br>(-0.7, -0.5)                                              |
| Saint Kitts and Nevis        | 5<br>(4, 5)             | 12.7<br>(11.6, 14) | 2<br>(2, 3)                | 3.7<br>(3.1, 4.4) | -0.7<br>(-0.8, -0.6)                                              |
| United States Virgin Islands | 3<br>(3, 4)             | 4.1<br>(3.4, 4.8)  | 5<br>(4, 5)                | 2.5<br>(2.1, 3)   | -0.4<br>(-0.5, -0.2)                                              |
| Bahamas                      | 13<br>(11, 15)          | 8.2<br>(7.2, 9.1)  | 12<br>(10, 15)             | 3.1<br>(2.6, 3.8) | -0.6<br>(-0.7, -0.5)                                              |
| Barbados                     | 8<br>(6, 10)            | 2.8<br>(2, 3.6)    | 13<br>(10, 15)             | 2.6<br>(2.2, 3.1) | -0.1<br>(-0.3, 0.4)                                               |
| Belize                       | 6<br>(5, 6)             | 5.9<br>(5.4, 6.6)  | 8<br>(7, 10)               | 3<br>(2.6, 3.5)   | -0.5<br>(-0.6, -0.4)                                              |
| Cuba                         | 659<br>(624, 690)       | 6.4<br>(6, 6.7)    | 442<br>(355, 548)          | 2.3<br>(1.9, 2.9) | -0.6<br>(-0.7, -0.5)                                              |

**Supplementary Table 5.** Continued

| Incidence of liver cancer        | 1990                    |                     | 2019                    |                     | Percentage change in Age-standardized rates between 1990 and 2019 |
|----------------------------------|-------------------------|---------------------|-------------------------|---------------------|-------------------------------------------------------------------|
|                                  | Counts (95% UI)         | Rate (95% UI)       | Counts (95% UI)         | Rate (95% UI)       |                                                                   |
| Dominica                         | 6<br>(5, 7)             | 8.6<br>(7.5, 9.7)   | 3<br>(2, 4)             | 3.2<br>(2.6, 3.9)   | -0.6<br>(-0.7, -0.5)                                              |
| Dominican Republic               | 155<br>(136, 176)       | 3.9<br>(3.4, 4.5)   | 435<br>(294, 660)       | 4.6<br>(3.2, 7)     | 0.2<br>(-0.2, 0.8)                                                |
| Grenada                          | 6<br>(6, 7)             | 8.9<br>(8, 9.9)     | 3<br>(3, 4)             | 3<br>(2.6, 3.4)     | -0.7<br>(-0.7, -0.6)                                              |
| Guyana                           | 26<br>(22, 30)          | 6.5<br>(5.6, 7.5)   | 19<br>(15, 24)          | 3<br>(2.4, 3.8)     | -0.5<br>(-0.7, -0.4)                                              |
| Haiti                            | 220<br>(137, 300)       | 6.7<br>(4.2, 9.2)   | 290<br>(176, 432)       | 4.1<br>(2.5, 6.3)   | -0.4<br>(-0.6, -0.1)                                              |
| Jamaica                          | 70<br>(65, 75)          | 3.9<br>(3.6, 4.2)   | 77<br>(61, 96)          | 2.6<br>(2.1, 3.3)   | -0.3<br>(-0.5, -0.1)                                              |
| Saint Lucia                      | 5<br>(5, 6)             | 6<br>(5.5, 6.6)     | 5<br>(4, 6)             | 2.2<br>(1.8, 2.6)   | -0.6<br>(-0.7, -0.6)                                              |
| Saint Vincent and the Grenadines | 5<br>(5, 6)             | 7.2<br>(6.6, 7.8)   | 4<br>(3, 5)             | 3<br>(2.6, 3.4)     | -0.6<br>(-0.6, -0.5)                                              |
| Suriname                         | 17<br>(15, 19)          | 6.4<br>(5.8, 7.2)   | 16<br>(12, 19)          | 2.6<br>(2.1, 3.2)   | -0.6<br>(-0.7, -0.5)                                              |
| Trinidad and Tobago              | 57<br>(53, 60)          | 6.7<br>(6.2, 7.1)   | 46<br>(35, 61)          | 2.5<br>(1.9, 3.3)   | -0.6<br>(-0.7, -0.5)                                              |
| Andean Latin America             | 1,036<br>(910, 1,168)   | 4.9<br>(4.3, 5.5)   | 1,735<br>(1,419, 2,114) | 3.1<br>(2.5, 3.8)   | -0.4<br>(-0.5, -0.2)                                              |
| Bolivia (Plurinational State of) | 162<br>(122, 213)       | 4.9<br>(3.7, 6.4)   | 399<br>(296, 520)       | 4.6<br>(3.4, 5.9)   | -0.1<br>(-0.3, 0.3)                                               |
| Ecuador                          | 155<br>(139, 172)       | 2.8<br>(2.5, 3.1)   | 505<br>(400, 653)       | 3.4<br>(2.7, 4.4)   | 0.2<br>(-0.1, 0.6)                                                |
| Peru                             | 719<br>(619, 829)       | 5.8<br>(5, 6.7)     | 831<br>(618, 1,103)     | 2.6<br>(1.9, 3.5)   | -0.6<br>(-0.7, -0.4)                                              |
| Central Latin America            | 2,970<br>(2,764, 3,123) | 3.5<br>(3.2, 3.7)   | 7,987<br>(6,880, 9,272) | 3.4<br>(3, 4)       | 0<br>(-0.1, 0.1)                                                  |
| Colombia                         | 509<br>(483, 535)       | 2.8<br>(2.7, 3)     | 1,318<br>(1,002, 1,690) | 2.5<br>(1.9, 3.2)   | -0.1<br>(-0.3, 0.1)                                               |
| Costa Rica                       | 96<br>(89, 102)         | 5.4<br>(5, 5.8)     | 261<br>(202, 331)       | 5.1<br>(4, 6.5)     | -0.1<br>(-0.3, 0.2)                                               |
| El Salvador                      | 103<br>(95, 111)        | 3.4<br>(3.1, 3.6)   | 118<br>(89, 153)        | 2<br>(1.5, 2.6)     | -0.4<br>(-0.6, -0.2)                                              |
| Guatemala                        | 344<br>(305, 388)       | 9.3<br>(8.3, 10.5)  | 498<br>(394, 628)       | 4.5<br>(3.6, 5.6)   | -0.5<br>(-0.6, -0.4)                                              |
| Honduras                         | 231<br>(92, 333)        | 11.1<br>(4.2, 16.1) | 879<br>(408, 1,299)     | 14.8<br>(6.8, 21.7) | 0.3<br>(0, 1)                                                     |
| Mexico                           | 970<br>(935, 997)       | 2.2<br>(2.1, 2.3)   | 3,973<br>(3,436, 4,550) | 3.5<br>(3, 4)       | 0.5<br>(0.3, 0.8)                                                 |

**Supplementary Table 5.** Continued

| Incidence of liver cancer          | 1990                      |                      | 2019                       |                      | Percentage change in Age-standardized rates between 1990 and 2019 |
|------------------------------------|---------------------------|----------------------|----------------------------|----------------------|-------------------------------------------------------------------|
|                                    | Counts (95% UI)           | Rate (95% UI)        | Counts (95% UI)            | Rate (95% UI)        |                                                                   |
| Nicaragua                          | 50<br>(44, 56)            | 3<br>(2.6, 3.5)      | 165<br>(133, 202)          | 3.8<br>(3.1, 4.6)    | 0.2<br>(0, 0.6)                                                   |
| Panama                             | 50<br>(46, 54)            | 3.3<br>(3, 3.5)      | 121<br>(92, 155)           | 2.9<br>(2.2, 3.8)    | -0.1<br>(-0.3, 0.2)                                               |
| Venezuela (Bolivarian Republic of) | 617<br>(588, 646)         | 6.4<br>(6, 6.7)      | 654<br>(502, 855)          | 2.3<br>(1.8, 3)      | -0.6<br>(-0.7, -0.5)                                              |
| Tropical Latin America             | 1,846<br>(1,774, 1,903)   | 2<br>(1.9, 2)        | 5,667<br>(5,335, 5,956)    | 2.4<br>(2.2, 2.5)    | 0.2<br>(0.1, 0.3)                                                 |
| Brazil                             | 1,794<br>(1,726, 1,850)   | 2<br>(1.9, 2)        | 5,555<br>(5,239, 5,841)    | 2.4<br>(2.2, 2.5)    | 0.2<br>(0.1, 0.3)                                                 |
| Paraguay                           | 52<br>(45, 60)            | 2.3<br>(2, 2.7)      | 112<br>(84, 146)           | 2.1<br>(1.5, 2.7)    | -0.1<br>(-0.4, 0.2)                                               |
| North Africa and Middle East       | 10,734<br>(9,445, 11,997) | 6.1<br>(5.3, 6.8)    | 27,546<br>(22,113, 33,841) | 6.3<br>(5.1, 7.7)    | 0<br>(-0.2, 0.4)                                                  |
| Algeria                            | 207<br>(168, 256)         | 1.7<br>(1.4, 2.1)    | 720<br>(562, 908)          | 2.2<br>(1.7, 2.8)    | 0.3<br>(0, 0.7)                                                   |
| Afghanistan                        | 843<br>(646, 1,082)       | 11.5<br>(8.9, 14.5)  | 1,408<br>(1,057, 1,848)    | 9.8<br>(7.6, 12.4)   | -0.1<br>(-0.4, 0.2)                                               |
| Sudan                              | 330<br>(195, 495)         | 3.5<br>(2.1, 5.4)    | 674<br>(393, 1,048)        | 3.7<br>(2.2, 5.8)    | 0<br>(-0.3, 0.5)                                                  |
| Bahrain                            | 9<br>(7, 11)              | 5.6<br>(4.7, 6.6)    | 44<br>(34, 57)             | 5.5<br>(4.4, 6.9)    | 0<br>(-0.3, 0.3)                                                  |
| Egypt                              | 5,143<br>(4,090, 6,179)   | 16.7<br>(13.1, 20.2) | 13,841<br>(9,844, 19,064)  | 20.9<br>(15.1, 28.5) | 0.2<br>(-0.2, 0.9)                                                |
| Iran (Islamic Republic of)         | 1,068<br>(881, 1,245)     | 4.3<br>(3.5, 5.1)    | 2,722<br>(2,475, 2,991)    | 3.9<br>(3.5, 4.3)    | -0.1<br>(-0.3, 0.2)                                               |
| Iraq                               | 353<br>(273, 439)         | 4.4<br>(3.4, 5.4)    | 1,407<br>(1,069, 1,783)    | 6.1<br>(4.7, 7.6)    | 0.4<br>(0, 1)                                                     |
| Jordan                             | 40<br>(32, 49)            | 3<br>(2.4, 3.8)      | 154<br>(124, 191)          | 2.5<br>(2, 3)        | -0.2<br>(-0.4, 0.1)                                               |
| Kuwait                             | 18<br>(16, 20)            | 2.8<br>(2.5, 3.1)    | 66<br>(52, 82)             | 2.7<br>(2.2, 3.4)    | 0<br>(-0.2, 0.2)                                                  |
| Lebanon                            | 79<br>(64, 97)            | 3.4<br>(2.8, 4.2)    | 192<br>(143, 266)          | 3.7<br>(2.7, 5.1)    | 0.1<br>(-0.3, 0.6)                                                |
| Libya                              | 100<br>(76, 130)          | 5.2<br>(3.9, 6.7)    | 271<br>(200, 374)          | 5.2<br>(3.9, 7.1)    | 0<br>(-0.3, 0.5)                                                  |
| Morocco                            | 249<br>(183, 307)         | 1.9<br>(1.4, 2.4)    | 632<br>(481, 778)          | 2.2<br>(1.6, 2.6)    | 0.1<br>(-0.2, 0.5)                                                |
| Palestine                          | 72<br>(53, 96)            | 8.4<br>(6.3, 11.1)   | 149<br>(125, 180)          | 6.6<br>(5.5, 7.9)    | -0.2<br>(-0.5, 0.1)                                               |
| Oman                               | 31<br>(22, 41)            | 4.2<br>(2.9, 5.7)    | 98<br>(79, 122)            | 5.3<br>(4.5, 6.3)    | 0.2<br>(-0.1, 0.9)                                                |



**Supplementary Table 5.** Continued

| Incidence of liver cancer        | 1990                       |                    | 2019                       |                      | Percentage change in Age-standardized rates between 1990 and 2019 |
|----------------------------------|----------------------------|--------------------|----------------------------|----------------------|-------------------------------------------------------------------|
|                                  | Counts (95% UI)            | Rate (95% UI)      | Counts (95% UI)            | Rate (95% UI)        |                                                                   |
| Qatar                            | 15<br>(11, 19)             | 16.1<br>(12.1, 21) | 108<br>(76, 147)           | 17.4<br>(12.8, 22.9) | 0.1<br>(-0.2, 0.5)                                                |
| Saudi Arabia                     | 291<br>(212, 373)          | 5<br>(3.7, 6.4)    | 855<br>(645, 1,124)        | 5.3<br>(4.2, 6.7)    | 0.1<br>(-0.3, 0.6)                                                |
| Syrian Arab Republic             | 259<br>(196, 326)          | 4.9<br>(3.6, 6.2)  | 535<br>(400, 711)          | 4.5<br>(3.4, 5.9)    | -0.1<br>(-0.4, 0.4)                                               |
| Tunisia                          | 94<br>(73, 121)            | 1.9<br>(1.5, 2.4)  | 240<br>(170, 336)          | 1.9<br>(1.4, 2.7)    | 0<br>(-0.3, 0.6)                                                  |
| Turkey                           | 1,349<br>(1,080, 1,640)    | 3.7<br>(3, 4.5)    | 2,768<br>(2,204, 3,413)    | 3.2<br>(2.6, 4)      | -0.1<br>(-0.4, 0.2)                                               |
| United Arab Emirates             | 21<br>(11, 37)             | 4.3<br>(2.1, 8.1)  | 219<br>(93, 496)           | 4.7<br>(2, 10.8)     | 0.1<br>(-0.4, 0.7)                                                |
| Yemen                            | 156<br>(98, 229)           | 3.2<br>(2, 4.7)    | 416<br>(301, 569)          | 3.2<br>(2.3, 4.3)    | 0<br>(-0.3, 0.4)                                                  |
| South Asia                       | 15,679<br>(13,213, 18,045) | 2.7<br>(2.2, 3.1)  | 37,733<br>(32,783, 43,281) | 2.7<br>(2.3, 3.1)    | 0<br>(-0.2, 0.2)                                                  |
| Bangladesh                       | 1,742<br>(1,384, 2,138)    | 3.1<br>(2.6, 3.8)  | 3,405<br>(2,661, 4,240)    | 2.6<br>(2, 3.2)      | -0.2<br>(-0.4, 0.1)                                               |
| Bhutan                           | 6<br>(4, 9)                | 2.2<br>(1.5, 3.2)  | 17<br>(12, 24)             | 3<br>(2.1, 4.3)      | 0.4<br>(0, 1)                                                     |
| India                            | 11,777<br>(9,852, 13,689)  | 2.5<br>(2.1, 3)    | 29,968<br>(25,244, 35,612) | 2.6<br>(2.2, 3.1)    | 0<br>(-0.2, 0.3)                                                  |
| Nepal                            | 179<br>(137, 232)          | 1.8<br>(1.4, 2.3)  | 460<br>(331, 662)          | 2.1<br>(1.5, 3.1)    | 0.2<br>(-0.2, 0.6)                                                |
| Pakistan                         | 1,976<br>(1,345, 2,622)    | 3.3<br>(2.2, 4.4)  | 3,884<br>(3,101, 4,736)    | 3.3<br>(2.6, 4)      | 0<br>(-0.3, 0.5)                                                  |
| Central Sub-Saharan Africa       | 687<br>(563, 827)          | 2.6<br>(2.2, 3.1)  | 1,364<br>(1,080, 1,715)    | 2.3<br>(1.8, 2.9)    | -0.1<br>(-0.3, 0.2)                                               |
| Angola                           | 112<br>(84, 147)           | 2.5<br>(1.9, 3.3)  | 294<br>(226, 377)          | 2.4<br>(1.9, 3)      | -0.1<br>(-0.3, 0.3)                                               |
| Central African Republic         | 47<br>(32, 65)             | 3.5<br>(2.5, 4.9)  | 74<br>(46, 111)            | 3.2<br>(2.1, 4.7)    | -0.1<br>(-0.3, 0.2)                                               |
| Congo                            | 46<br>(34, 63)             | 4<br>(3, 5.4)      | 77<br>(55, 107)            | 2.9<br>(2.1, 3.9)    | -0.3<br>(-0.5, 0)                                                 |
| Democratic Republic of the Congo | 456<br>(367, 564)          | 2.5<br>(2, 3)      | 870<br>(659, 1,142)        | 2.1<br>(1.6, 2.8)    | -0.1<br>(-0.4, 0.2)                                               |
| Equatorial Guinea                | 7<br>(5, 9)                | 3<br>(2.3, 4)      | 16<br>(9, 24)              | 3.2<br>(1.9, 4.6)    | 0<br>(-0.4, 0.7)                                                  |
| Gabon                            | 20<br>(14, 25)             | 3.3<br>(2.5, 4.3)  | 34<br>(23, 49)             | 3.3<br>(2.2, 4.7)    | 0<br>(-0.4, 0.5)                                                  |
| Eastern Sub-Saharan Africa       | 2,444<br>(1,992, 3,027)    | 2.9<br>(2.4, 3.7)  | 5,439<br>(4,462, 6,714)    | 3.1<br>(2.6, 3.8)    | 0.1<br>(-0.1, 0.3)                                                |

**Supplementary Table 5.** Continued

| Incidence of liver cancer   | 1990                    |                    | 2019                    |                   | Percentage change in Age-standardized rates between 1990 and 2019 |
|-----------------------------|-------------------------|--------------------|-------------------------|-------------------|-------------------------------------------------------------------|
|                             | Counts (95% UI)         | Rate (95% UI)      | Counts (95% UI)         | Rate (95% UI)     |                                                                   |
| Burundi                     | 94<br>(68, 124)         | 3.7<br>(2.7, 4.8)  | 141<br>(97, 221)        | 2.9<br>(2, 4.5)   | -0.2<br>(-0.5, 0.2)                                               |
| South Sudan                 | 78<br>(49, 141)         | 3<br>(1.9, 5.5)    | 110<br>(65, 192)        | 2.7<br>(1.6, 4.8) | -0.1<br>(-0.3, 0.2)                                               |
| Comoros                     | 7<br>(4, 12)            | 3.1<br>(1.7, 5.2)  | 14<br>(9, 21)           | 2.8<br>(1.9, 4.3) | -0.1<br>(-0.4, 0.6)                                               |
| Djibouti                    | 5<br>(3, 9)             | 3.1<br>(2.1, 5.4)  | 20<br>(12, 34)          | 3.2<br>(2.1, 5.2) | 0<br>(-0.3, 0.4)                                                  |
| Eritrea                     | 35<br>(24, 54)          | 3.2<br>(2.2, 4.9)  | 87<br>(60, 128)         | 3.1<br>(2.2, 4.4) | 0<br>(-0.3, 0.4)                                                  |
| Ethiopia                    | 642<br>(446, 926)       | 2.9<br>(2.1, 4)    | 1155<br>(930, 1,476)    | 2.7<br>(2.2, 3.5) | -0.1<br>(-0.4, 0.4)                                               |
| Kenya                       | 219<br>(151, 384)       | 2.5<br>(1.7, 4.4)  | 663<br>(432, 982)       | 2.9<br>(1.9, 4.3) | 0.2<br>(-0.1, 0.4)                                                |
| Madagascar                  | 164<br>(118, 274)       | 2.9<br>(2, 5)      | 285<br>(193, 430)       | 2.4<br>(1.7, 3.7) | -0.2<br>(-0.4, 0.2)                                               |
| Malawi                      | 160<br>(119, 222)       | 3.2<br>(2.5, 4.6)  | 241<br>(187, 303)       | 2.8<br>(2.2, 3.5) | -0.1<br>(-0.4, 0.2)                                               |
| Mozambique                  | 133<br>(94, 214)        | 2.1<br>(1.5, 3.4)  | 441<br>(303, 585)       | 3.7<br>(2.5, 4.8) | 0.7<br>(-0.2, 1.8)                                                |
| Rwanda                      | 158<br>(114, 220)       | 5<br>(3.7, 6.8)    | 279<br>(212, 369)       | 4.4<br>(3.5, 5.7) | -0.1<br>(-0.4, 0.3)                                               |
| Somalia                     | 98<br>(59, 170)         | 3.5<br>(2.2, 6.1)  | 240<br>(150, 425)       | 3.3<br>(2.1, 5.9) | -0.1<br>(-0.3, 0.4)                                               |
| United Republic of Tanzania | 255<br>(203, 314)       | 2<br>(1.7, 2.5)    | 600<br>(464, 765)       | 2.2<br>(1.8, 2.8) | 0.1<br>(-0.1, 0.4)                                                |
| Uganda                      | 318<br>(255, 388)       | 4.5<br>(3.6, 5.4)  | 963<br>(744, 1217)      | 6.1<br>(4.8, 7.5) | 0.4<br>(0, 0.8)                                                   |
| Zambia                      | 76<br>(56, 108)         | 2.4<br>(1.8, 3.4)  | 195<br>(149, 247)       | 2.7<br>(2.1, 3.4) | 0.2<br>(-0.3, 0.7)                                                |
| Southern Sub-Saharan Africa | 1,908<br>(1,345, 3,153) | 6.5<br>(4.5, 10.7) | 4,016<br>(3,581, 4,521) | 6.8<br>(6.1, 7.6) | 0<br>(-0.4, 0.6)                                                  |
| Botswana                    | 6<br>(3, 13)            | 1<br>(0.5, 2.2)    | 22<br>(15, 31)          | 1.5<br>(1.1, 2)   | 0.5<br>(-0.3, 2.2)                                                |
| Lesotho                     | 52<br>(32, 110)         | 5.1<br>(3.2, 10.6) | 195<br>(78, 309)        | 14.4<br>(6, 22.7) | 1.8<br>(-0.3, 5)                                                  |
| Namibia                     | 14<br>(8, 25)           | 1.9<br>(1.2, 3.3)  | 48<br>(36, 63)          | 3.3<br>(2.5, 4.2) | 0.8<br>(0, 2.1)                                                   |
| South Africa                | 1,306<br>(866, 2,211)   | 5.8<br>(3.8, 9.8)  | 2,600<br>(2,291, 2,946) | 5.6<br>(4.9, 6.3) | 0<br>(-0.5, 0.6)                                                  |
| Eswatini                    | 18<br>(11, 35)          | 5.6<br>(3.7, 10.8) | 119<br>(34, 220)        | 18.4<br>(5.6, 33) | 2.3<br>(-0.4, 6.7)                                                |

**Supplementary Table 5.** Continued

| Incidence of liver cancer  | 1990                    |                      | 2019                     |                      | Percentage change in Age-standardized rates between 1990 and 2019 |
|----------------------------|-------------------------|----------------------|--------------------------|----------------------|-------------------------------------------------------------------|
|                            | Counts (95% UI)         | Rate (95% UI)        | Counts (95% UI)          | Rate (95% UI)        |                                                                   |
| Zimbabwe                   | 512<br>(397, 796)       | 11.8<br>(9.2, 17.9)  | 1,032<br>(760, 1,405)    | 13.6<br>(10.3, 18.1) | 0.2<br>(-0.2, 0.6)                                                |
| Western Sub-Saharan Africa | 5,114<br>(4,328, 5,960) | 5.4<br>(4.6, 6.3)    | 9,709<br>(8,164, 11,417) | 4.9<br>(4.2, 5.7)    | -0.1<br>(-0.3, 0.1)                                               |
| Benin                      | 138<br>(111, 175)       | 6.5<br>(5.2, 8.4)    | 249<br>(182, 337)        | 4.8<br>(3.6, 6.4)    | -0.3<br>(-0.5, 0)                                                 |
| Burkina Faso               | 143<br>(112, 179)       | 3<br>(2.4, 3.6)      | 233<br>(174, 302)        | 2.2<br>(1.7, 2.7)    | -0.3<br>(-0.5, 0)                                                 |
| Cameroon                   | 30<br>(21, 45)          | 0.6<br>(0.4, 1)      | 85<br>(60, 116)          | 0.7<br>(0.5, 0.9)    | 0<br>(-0.3, 0.5)                                                  |
| Cabo Verde                 | 3<br>(2, 3)             | 1.1<br>(0.9, 1.3)    | 50<br>(41, 61)           | 11.6<br>(9.5, 13.9)  | 9.6<br>(7.4, 12.5)                                                |
| Chad                       | 182<br>(141, 234)       | 6.2<br>(4.8, 7.9)    | 317<br>(237, 412)        | 5.3<br>(4, 6.8)      | -0.1<br>(-0.3, 0.1)                                               |
| Cote d'Ivoire              | 331<br>(247, 426)       | 7.5<br>(5.7, 9.4)    | 534<br>(384, 738)        | 4.7<br>(3.5, 6.4)    | -0.4<br>(-0.5, -0.2)                                              |
| Gambia                     | 121<br>(89, 162)        | 29.7<br>(22.3, 39)   | 409<br>(292, 541)        | 38.2<br>(27.5, 49.7) | 0.3<br>(-0.1, 0.9)                                                |
| Ghana                      | 393<br>(299, 526)       | 5.8<br>(4.5, 7.7)    | 980<br>(725, 1,260)      | 5.7<br>(4.3, 7.2)    | 0<br>(-0.4, 0.4)                                                  |
| Guinea                     | 1,032<br>(859, 1,243)   | 29.9<br>(24.9, 35.8) | 1,881<br>(1,308, 2,447)  | 32.2<br>(22.3, 41.9) | 0.1<br>(-0.3, 0.5)                                                |
| Guinea-Bissau              | 35<br>(25, 51)          | 8.1<br>(5.9, 11.3)   | 48<br>(34, 66)           | 6.1<br>(4.4, 8.3)    | -0.2<br>(-0.5, 0.1)                                               |
| Liberia                    | 78<br>(61, 101)         | 6.8<br>(5.4, 8.8)    | 107<br>(75, 154)         | 4.9<br>(3.6, 7.2)    | -0.3<br>(-0.5, 0)                                                 |
| Mali                       | 696<br>(571, 838)       | 15.1<br>(12.4, 18.2) | 1,358<br>(997, 1,803)    | 14.5<br>(10.7, 19)   | 0<br>(-0.3, 0.3)                                                  |
| Mauritania                 | 72<br>(58, 88)          | 6.9<br>(5.6, 8.4)    | 86<br>(63, 114)          | 4.1<br>(3, 5.3)      | -0.4<br>(-0.6, -0.2)                                              |
| Niger                      | 20<br>(16, 25)          | 0.7<br>(0.5, 0.8)    | 51<br>(37, 68)           | 0.6<br>(0.5, 0.8)    | -0.1<br>(-0.3, 0.2)                                               |
| Nigeria                    | 1,559<br>(1,184, 1,976) | 3.3<br>(2.5, 4.2)    | 2,786<br>(2,157, 3,527)  | 3.3<br>(2.6, 4)      | 0<br>(-0.3, 0.4)                                                  |
| Sao Tome and Principe      | 2<br>(1, 2)             | 2.4<br>(1.9, 3)      | 3<br>(2, 4)              | 2.6<br>(1.8, 3.5)    | 0.1<br>(-0.3, 0.5)                                                |
| Senegal                    | 77<br>(61, 92)          | 2.2<br>(1.8, 2.7)    | 163<br>(120, 208)        | 2.1<br>(1.5, 2.6)    | -0.1<br>(-0.3, 0.3)                                               |
| Sierra Leone               | 116<br>(87, 150)        | 5.8<br>(4.4, 7.5)    | 176<br>(130, 235)        | 4.6<br>(3.5, 6)      | -0.2<br>(-0.4, 0.1)                                               |
| Togo                       | 87<br>(68, 110)         | 6.4<br>(5.1, 8.1)    | 192<br>(144, 252)        | 4.9<br>(3.8, 6.4)    | -0.2<br>(-0.4, 0.1)                                               |

UI, uncertainty interval; SDI, sociodemographic index.
